# Supplementary material for: A molecular dynamics study on two promising green surfactant micelles of choline dodecyl sulfate and laurate
Source: Royal Society of Chemistry journal article supplement (doi:10.1039/c6ra16536b), 2016-01-01
Supplement: c6ra16536b1.pdf [file c6ra16536b1.pdf]

Supporting Information for

**A molecular dynamics study on two promising green surfactant  
micelles of Choline Dodecyl Sulfate and laurate**

Yaoyao Wei<sup>a</sup>, Honglei Wang<sup>b</sup>, Guokui Liu<sup>a</sup>, Zhongni Wang<sup>c</sup>, and Shiling Yuan<sup>a</sup>

<sup>a</sup>Key Lab of Colloid and Interface Chemistry, Shandong University, Jinan 250100, China

<sup>b</sup>Qingdao institute of bioenergy and bioprocess technology, Chinese Academy of Sciences,  
Qingdao 266101, China.

<sup>c</sup>College of Chemistry, Chemical Engineering and Materials Science, Collaborative Innovation  
Center of Functionalized Probes for Chemical Imaging in Universities of Shandong, Shandong  
Normal University, Jinan 250014, PR China

Detailed force field parameters for all the studied systems are shown as follows:

Table S1 to S5 show the bonded and nonbonded parameters, and Fig. S1 show Partial atomic charges of dodecyl sulfate (DS<sup>-</sup>), laurate (C12) and choline (Ch<sup>+</sup>).

**Table S1** Bond-Stretching Parameters

|                              | Force constant $K_b$<br>( $10^6 \text{kJmol}^{-1}\text{nm}^{-4}$ ) | Ideal bond length<br>$b_0(\text{nm})$ |
|------------------------------|--------------------------------------------------------------------|---------------------------------------|
| -C-C- (DS <sup>-</sup> ,C12) | 7.15                                                               | 0.153                                 |
| -C-H                         | 12.1                                                               | 0.110                                 |
| -C-O-                        | 6.10                                                               | 0.144                                 |
| -S-O                         | 8.37                                                               | 0.150                                 |
| -S-O-                        | 3.38                                                               | 0.164                                 |
| -C-N-                        | 3.73                                                               | 0.151                                 |
| -C-C-                        | 5.43                                                               | 0.152                                 |
| -C-O                         | 1.31                                                               | 0.127                                 |
| -O-H                         | 7.96                                                               | 0.097                                 |

**Table S2** Bond-Angle Bending Parameters

|       | Force constant $K_\theta$<br>(kJmol <sup>-1</sup> ) | Ideal bond angle $\vartheta_0$<br>(degree) |
|-------|-----------------------------------------------------|--------------------------------------------|
| C-C-H | 842                                                 | 109.0                                      |
| C-C-C | 530                                                 | 111.0                                      |
| H-C-H | 987                                                 | 107.0                                      |
| C-O-S | 50                                                  | 115.0                                      |
| O-C-C | 320                                                 | 109.5                                      |
| O-S-O | 503                                                 | 106.8                                      |
| N-C-H | 443                                                 | 108.5                                      |
| C-N-C | 1680                                                | 109.0                                      |
| N-C-C | 610                                                 | 115.0                                      |
| O-C-O | 770                                                 | 126.0                                      |
| C-O-H | 450                                                 | 109.5                                      |

**Table S3** Dihedral-angle parameters

|         | Force constant $K_\zeta$<br>(kJmol <sup>-1</sup> degree <sup>-2</sup> ) | Ideal dihedral angle $\zeta_0$<br>(degree) |
|---------|-------------------------------------------------------------------------|--------------------------------------------|
| C-C-C-H | 3.77                                                                    | 0.0                                        |
| C-C-O-S | 1.26                                                                    | 0.0                                        |
| C-O-S-O | 1.05                                                                    | 0.0                                        |
| C-C-C-C | 3.77                                                                    | 0.0                                        |
| C-C-N-C | 1.05                                                                    | 0.0                                        |
| C-C-O-H | 1.26                                                                    | 0.0                                        |
| O-C-C-N | 5.92                                                                    | 0.0                                        |
| C-N-C-H | 1.05                                                                    | 0.0                                        |

**Table S4** Improper (harmonic) dihedral-angle parameters

|         | Force constant $K_{\zeta}$<br>(kJmol <sup>-1</sup> degree <sup>-2</sup> ) | Ideal improper dihedral angle<br>$\zeta_0$ (degree) |
|---------|---------------------------------------------------------------------------|-----------------------------------------------------|
| C-C-O-O | 167.36                                                                    | 0.0                                                 |

**Table S5** Normal van der Waals Parameters

| Atom type | [C6(I,I)] <sup>1/2</sup> [(kJmol <sup>-1</sup> nm <sup>6</sup> ) <sup>1/2</sup> ] | [C12(I,I)] <sup>1/2</sup> [10 <sup>-3</sup> (kJmol <sup>-1</sup> nm <sup>12</sup> ) <sup>1/2</sup> ] |
|-----------|-----------------------------------------------------------------------------------|------------------------------------------------------------------------------------------------------|
| OM        | 0.04756                                                                           | 0.8611                                                                                               |
| HC        | 0.009200                                                                          | 0.1230                                                                                               |
| SDmso     | 0.10277                                                                           | 4.6366                                                                                               |
| C         | 0.04838                                                                           | 2.222                                                                                                |

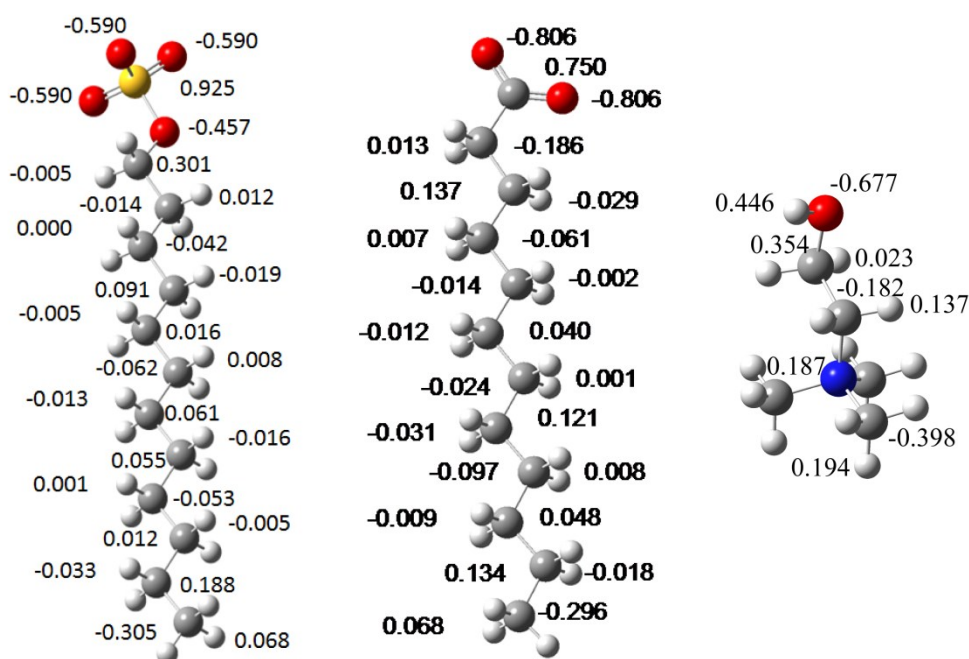**Figure S1** Partial charges of different groups in this study

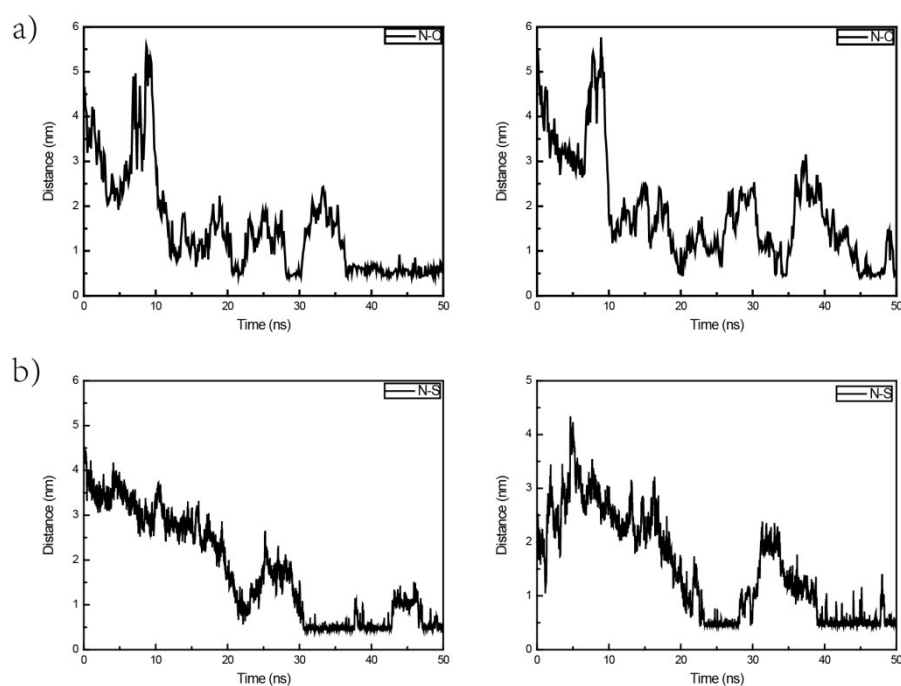

Fig. S2 The representative evolution of the distance between the head group and choline during simulations for a) ChC12 and b) ChDS. Since not all choline ions are absorbed, the result obtained here is the distance between one  $\text{Ch}^+$  ion and one surfactant molecule. For each system, two  $\text{Ch}^+$  molecules, absorbed in the last frame, are randomly selected via the VDW visual. And corresponding head groups are defined based on the selected  $\text{Ch}^+$  molecules individually. The label N-S in the top two figures means the distance between N of  $\text{Ch}^+$  ion and S of  $\text{DS}^-$ , and label N-C in the below means the distance between N of  $\text{Ch}^+$  ion and C of C12.

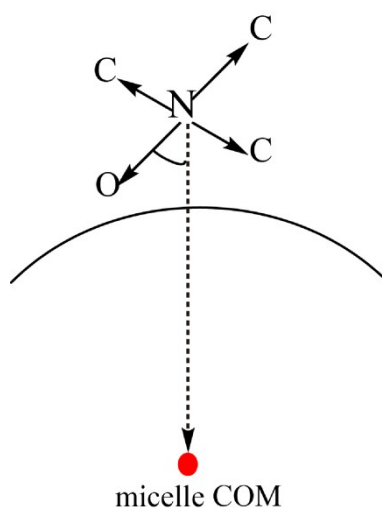

Fig. S3 Representative diagram of angle between the vectors N-micelle center of mass (COM) and N-terminal groups (including methyl groups and hydroxyl (OH) group). In the diagram, the labeled angle between N- micelle COM and N-OH is used as an example.

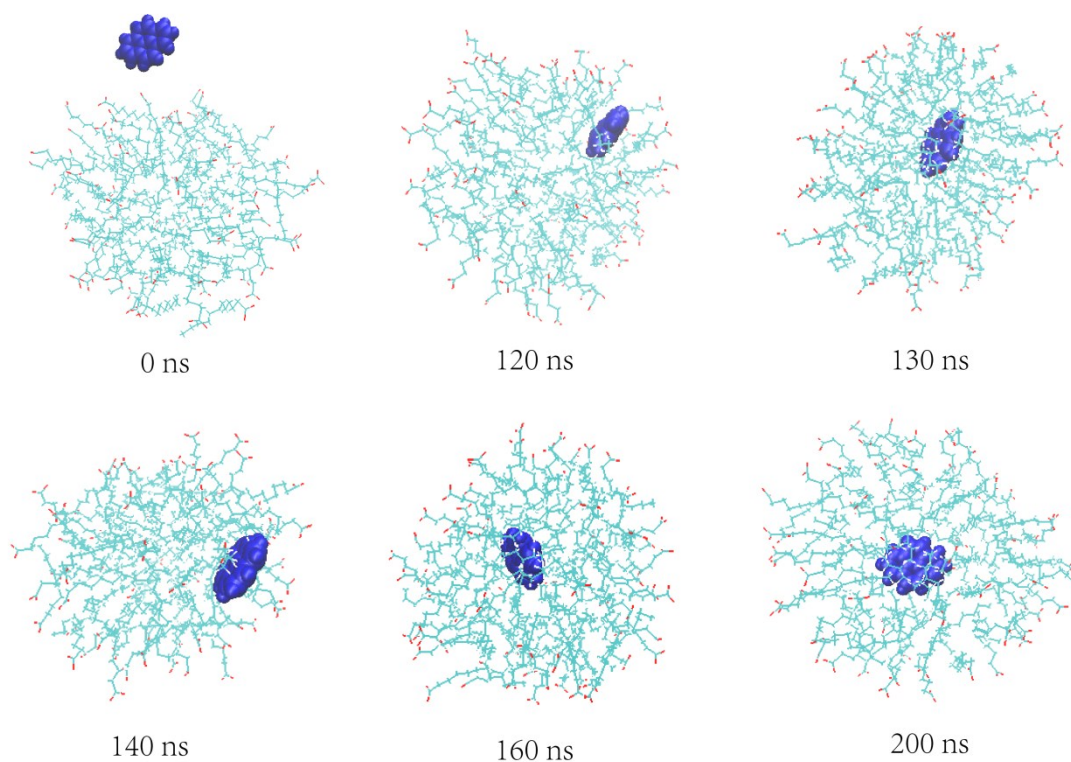

Fig. S4 Representative snapshots for Choline laurate with pyrene (ChCPy) system at specific time, especially the time when the distance between pyrene center and micelle center shows large fluctuation. It is noted that ChCPy system is used as an example here. The initial and final locations are also shown as contrast. For clear representation, only laurate (C12) and pyrene (Py) molecules are included. Deep blue: Py molecule; Red: O atom; Turquoise: C atom of C12.

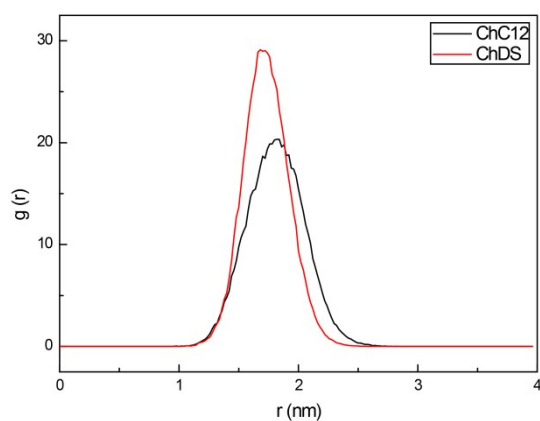

Fig. S5 Radial distribution functions ( $g(r)$ ) of head groups for the two micelles. The C atom of head group for ChC12 and S atom for ChDS are chosen to obtain the plots.
